# Supplementary material
Source: publisher site journal article supplement (https://www.dovepress.com/article/261304)
Supplement: Supplementary file 1 [file get_supplementary_file.php]

**Supplementary methods**

**Specificity and sensitivity of serologic test**

Clinical specificity was performed by measuring 52 healthy people serum. SARS-CoV-2 IgM and IgG presented the specificities of 96.2%(50/52) and 98.1(51/52), respectively, according to the following formula: Clinical specificity (%) = 100 x [True negative / (True Negative + False Positive)]; Furthermore, sensitivity was assessed on 257 patients diagnosed to SARS-CoV-2 infection by a RT-PCR nucleic acid test. SARS-CoV-2 IgM and IgG showed a clinical sensitivity of 89.8% (231/257) and 96.1% (247/257), respectively, according to the following formula: Clinical sensitivity (%) = 100 x [True Positive/ (True Positive + False Negative)].
